# Supplementary material for: Harnessing Noxa demethylation to overcome Bortezomib resistance in mantle cell lymphoma
Source: PubMed Central journal article supplement (PMC4694993; doi:10.18632/oncotarget.2903), 2015-02-25
Supplement: oncotarget-06-27332-s001.pdf [file oncotarget-06-27332-s001.pdf]

## SUPPLEMENTARY FIGURES AND TABLES

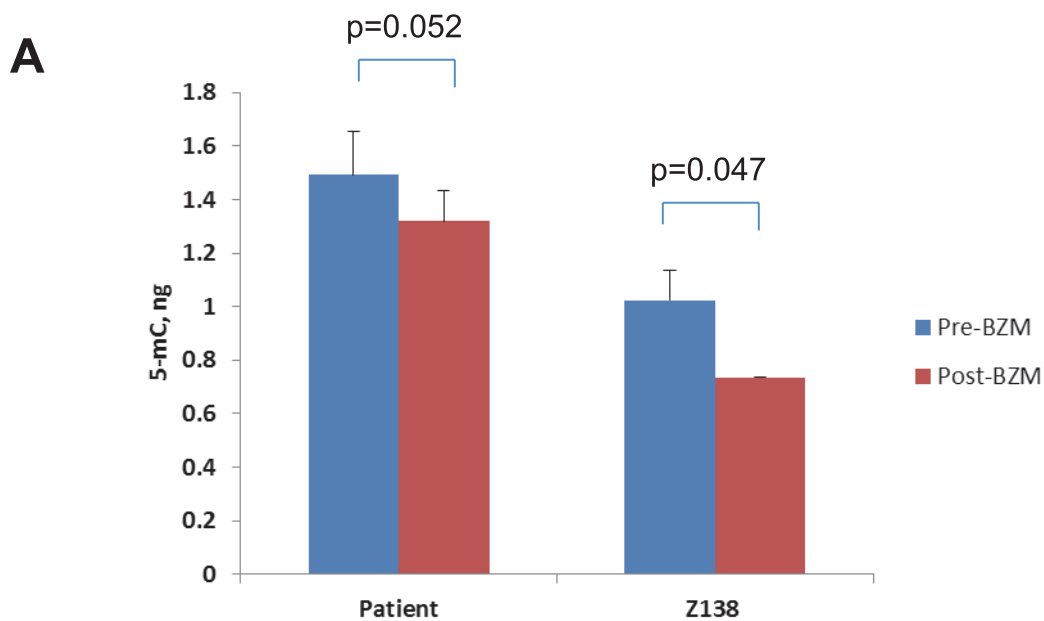**B**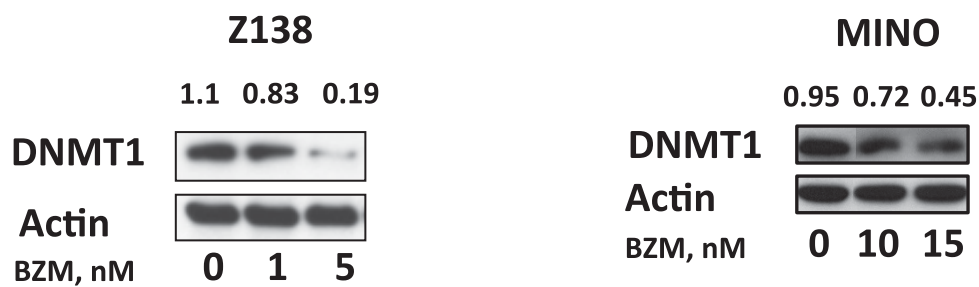

**Supplementary Figure S1: BZM causes DNA hypomethylation and affects DNMT1 expression in tumor cells from MCL patients and cell lines.** (A) Global DNA Methylation measured by 5-methylcytosine-modified genomic DNA quantification in MCL patient sample (average of two MCL patient samples) and Z138 MCL cell line before and 24 hours after BZM treatment. (B) Z138 and MINO cells were exposed to the indicated doses of BZM for 24 hours. Whole cell lysates were obtained and DNMT1 protein levels were analyzed by Western blotting. The ratio of DNMT1 to actin was determined by densitometry using ImageJ.

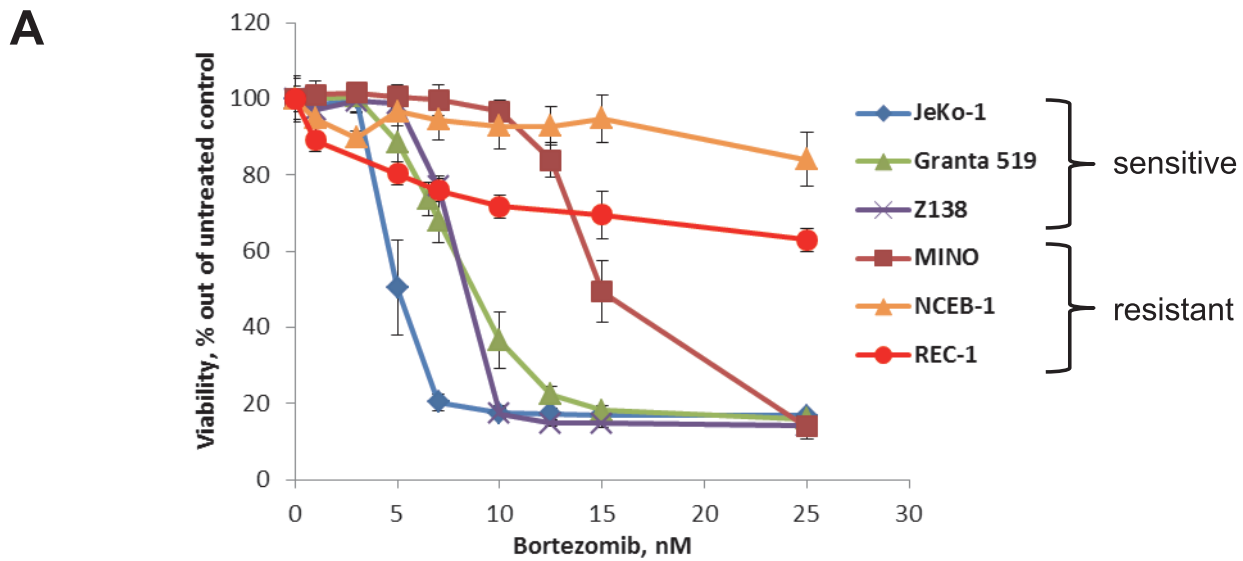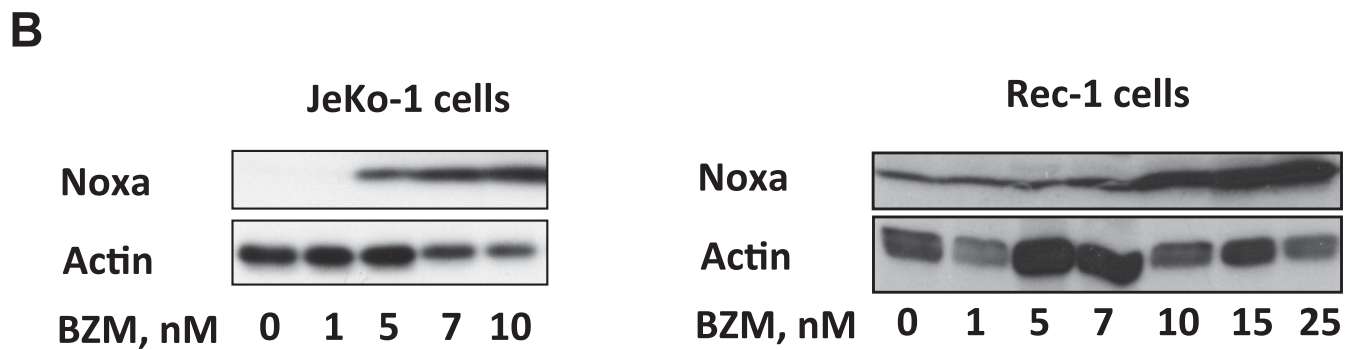

**Supplementary Figure S2: BZM induced growth inhibition and Noxa protein expression in MCL cells.** (A)  $10^6$  MCL cells/ml was treated with BZM at concentrations of 5–25 nM for 48 hours. Cell viability is expressed as percentage of control. JeKo-1, Granta 519, and Z138 represent sensitive lines while Mino, NCEB-1, and REC-1 represent resistant lines. Data represents average of 8 replicates per condition in two independent experiments; bars represent standard deviation. (B) Noxa protein expression in JeKo-1 and Rec-1 MCL cells treated with increasing concentrations of BZM for 24 hours and detected by Western blotting analysis. Endogenous Actin was used as loading control.

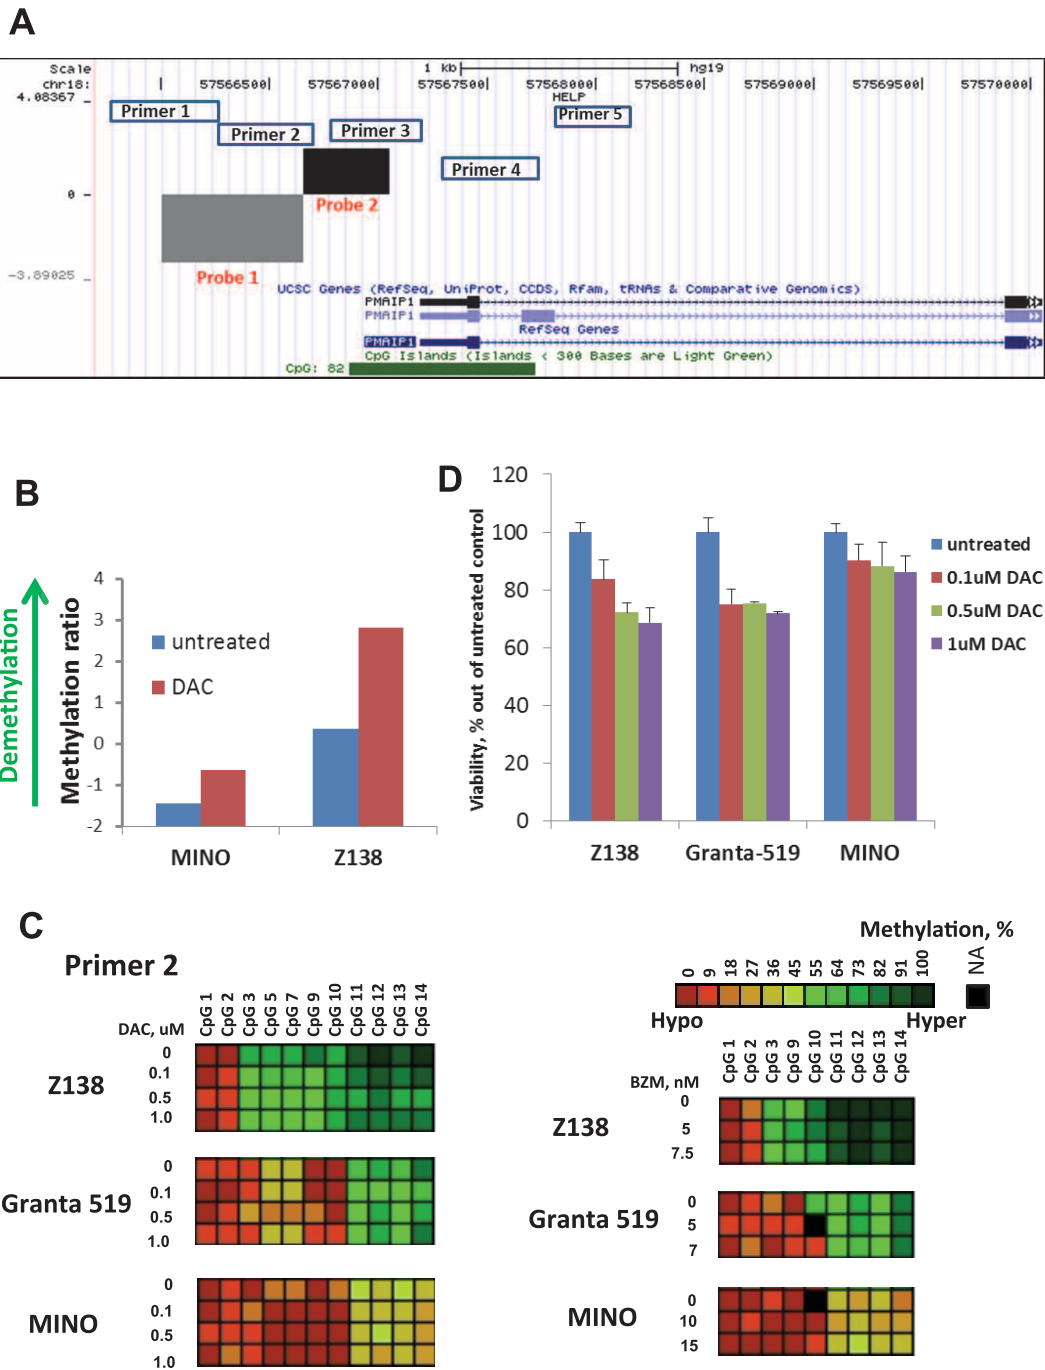

**Supplementary Figure S3: DAC and BZM cause Noxa promoter demethylation in MCL cell lines.** (A) University of California Santa Cruz (UCSC) Browser view of the Noxa (PMAIP1) locus. The areas covered by the HELP array Noxa Probe 1 (grey square) and Probe 2 (black square), the MassArray primers 1–5, a CpG island, direction of transcription, and Noxa (PMAIP1) gene start are indicated in the UCSC Browser view. (B) Changes in methylation values estimated by HpaII/MspI ratios difference (Y-axis) in Noxa promoter HELP array probes in MCL cell lines after treatment with DAC using HELP array. (C) Methylation of CpGs covered by primer 2 after treatments with BZM and DAC measured by MassArray. Scale shows percentage of methylation from 0% (low, in dark orange) to 100% (high, in dark green) for each CpGs. (D) Viability of MCL cell lines after 72 hours of treatment with DAC three times every 24 hr. Error bars indicate SD.

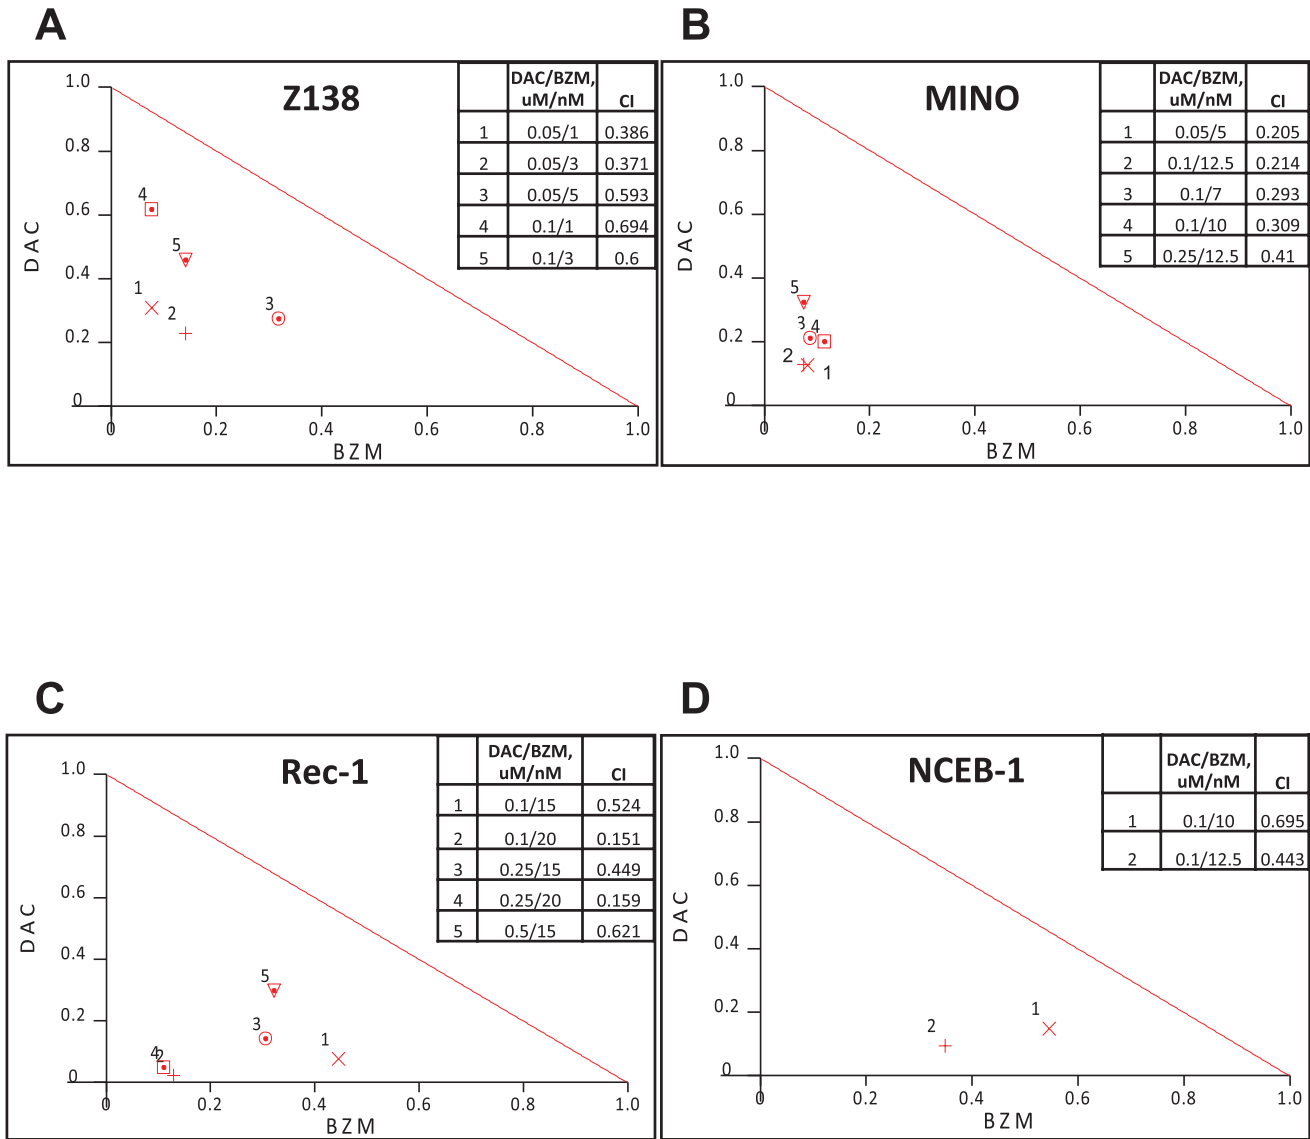

**Supplementary Figure S4: DAC synergies with BZM in MCL *in vitro*.** (A–D) DAC sensitizes BZM-sensitive and BZM-resistant MCL cells to BZM *in vitro* in Z138, MINO, Rec-1, and NCEB-1 cells, respectively. Combination indices (CI) values were determined using the Chou-Talalay equation, as calculated by Calcsyn software.

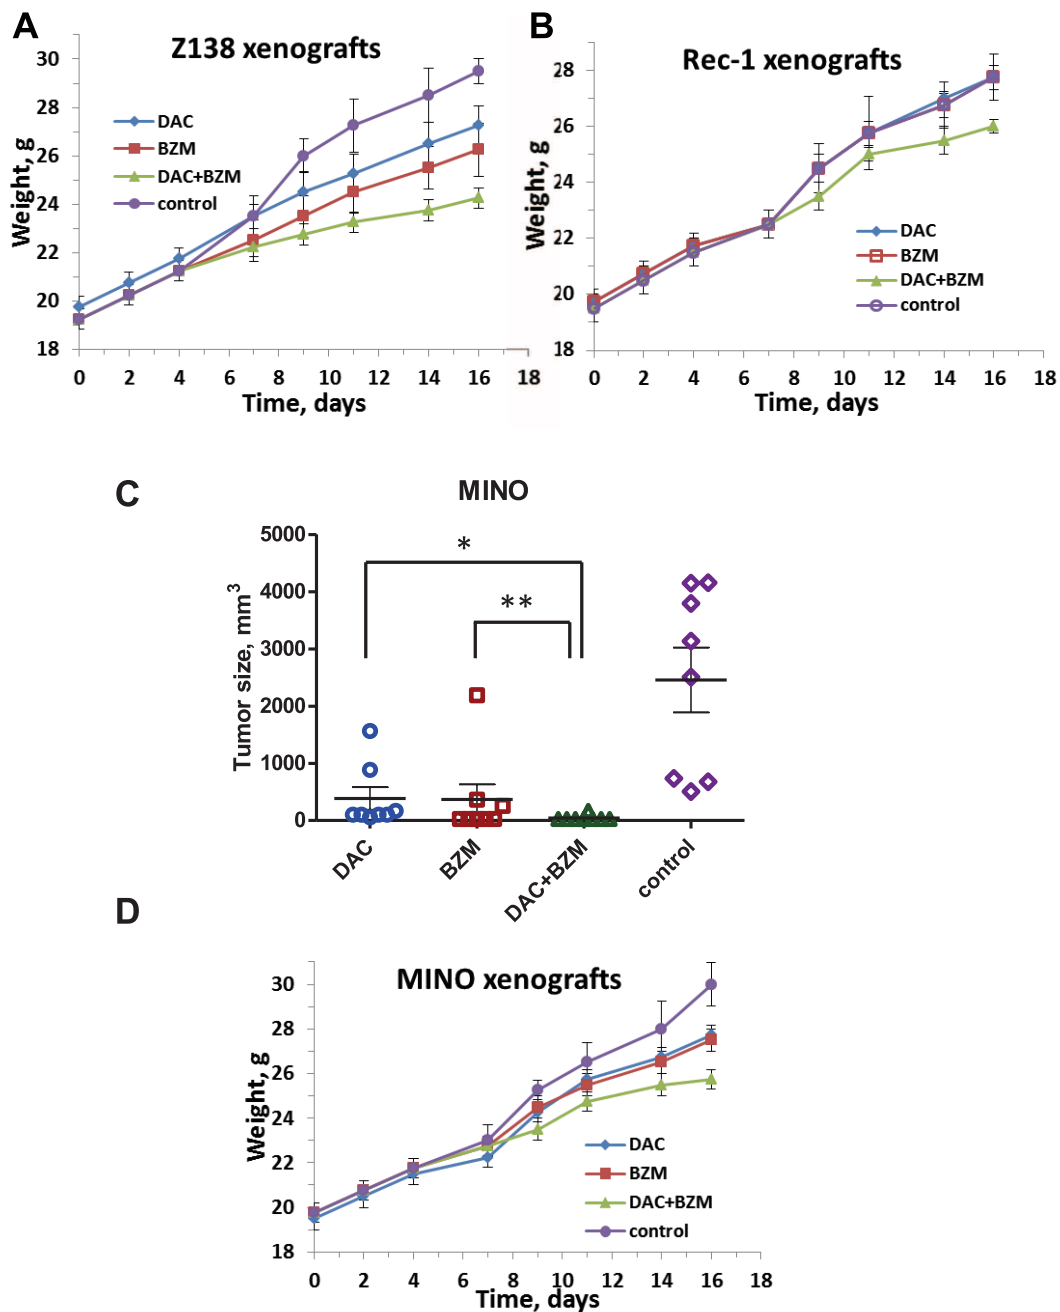

**Supplementary Figure S5: The effect of BZM and DAC in MCL xenograft experiments.** (A–B, D) Mouse weight for treatment cohorts expressed as means. Z138, Rec-1, and MINO MCL cell line were used. DAC was given IP as 3 injections of 0.2 mg/kg on day 1, 3, 5, 8, 10, 12 (1.2 mg/kg total), BZM was injected SC, 1 injection of 75  $\mu$ g/kg (Z138) or 100  $\mu$ g/kg (Rec-1, MINO) per week during 3 weeks. Control group of mice received SC diluent control (0.01% DMSO) injection once per week during 3 weeks. (C) BZM and DAC induce tumor growth inhibition in the MINO xenograft models. Tumor volumes for treatment cohorts expressed as means  $\pm$  SEM in 16 days from the beginning of treatment. DAC was given IP as 6 injections of 0.2 mg/kg on day 1, 3, 5, 8, 10, 12 (1.2 mg/kg total), BZM was injected SC, 1 injection of 100  $\mu$ g/kg per week during 3 weeks. Control group of mice received SC diluent control (0.01% DMSO) injection once per week during 3 weeks.  $N = 8$  for each group of mice. Statistical significance between the groups is indicated as follows: \* $P = 0.1$  for DAC+BZM vs DAC alone; \*\* $P = 0.24$  for DAC+BZM vs BZM alone.

**Supplementary Table 1: Hypomethylated genes in MCL Patients after BZM treatment (13102 Refseq IDs, 9561 genes, DM < 0.05,  $p < 0.05$ )**

**Supplementary Table 2: GSEA categorizes hypomethylated genes in MCL Patients after BZM treatment by gene families**

| Gene family                  | Number of genes |
|------------------------------|-----------------|
| Tumor suppressors            | 52              |
| Oncogenes                    | 197             |
| Translocated cancer genes    | 177             |
| Protein kinases              | 283             |
| Cell differentiation markers | 158             |
| Homeodomain proteins         | 158             |
| Transcription factors        | 905             |
| Cytokines and growth factors | 188             |

**Supplementary Table 3: Top canonical pathways categorized by the Ingenuity pathway analysis among hypomethylated genes in MCL patient samples after BZM treatment**

| Ingenuity Canonical Pathways                                              | <i>p</i> -value | Ratio (Number of molecules in experimental dataset out of total number in the pathway set) |
|---------------------------------------------------------------------------|-----------------|--------------------------------------------------------------------------------------------|
| Molecular Mechanisms of Cancer                                            | 0.000000085     | 198/379(0.522)                                                                             |
| Axonal Guidance Signaling                                                 | 0.000000104     | 224/433(0.517)                                                                             |
| Purine Metabolism                                                         | 0.000000443     | 160/398(0.402)                                                                             |
| Wnt/ $\beta$ -catenin Signaling                                           | 0.000000521     | 107/174(0.615)                                                                             |
| Protein Ubiquitination Pathway                                            | 0.000000762     | 154/274(0.562)                                                                             |
| Cell Cycle: G1/S Checkpoint Regulation                                    | 0.00000251      | 42/61(0.689)                                                                               |
| PI3K/AKT Signaling                                                        | 0.00000442      | 77/140(0.55)                                                                               |
| ERK5 Signaling                                                            | 0.000005        | 45/64(0.703)                                                                               |
| Protein Kinase A Signaling                                                | 0.00000529      | 176/331(0.532)                                                                             |
| Glucocorticoid Receptor Signaling                                         | 0.00000625      | 151/295(0.512)                                                                             |
| Cell Cycle: G2/M DNA Damage Checkpoint Regulation                         | 0.00000764      | 34/49(0.694)                                                                               |
| Cardiac Hypertrophy Signaling                                             | 0.0000225       | 129/245(0.527)                                                                             |
| PTEN Signaling                                                            | 0.0000256       | 69/124(0.556)                                                                              |
| Cyclins and Cell Cycle Regulation                                         | 0.0000303       | 53/89(0.596)                                                                               |
| Small Cell Lung Cancer Signaling                                          | 0.0000526       | 48/89(0.539)                                                                               |
| Notch Signaling                                                           | 0.0000536       | 29/43(0.674)                                                                               |
| Ephrin Receptor Signaling                                                 | 0.05051         | 102/200(0.51)                                                                              |
| Assembly of RNA Polymerase II Complex                                     | 0.0000588       | 36/56(0.643)                                                                               |
| Role of Osteoblasts, Osteoclasts and Chondrocytes in Rheumatoid Arthritis | 0.0000689       | 125/240(0.521)                                                                             |
| ATM Signaling                                                             | 0.0000705       | 37/54(0.685)                                                                               |

**Supplementary Table 4: Functional groups enriched by the Ingenuity pathway analysis of hypomethylated genes in MCL Patients after BZM treatment**

| in TMZ resistant DLBCL cell lines | Diseases or Functions Annotation        | <i>p</i> -Value | # Molecules |
|-----------------------------------|-----------------------------------------|-----------------|-------------|
| Gene Expression                   | transcription                           | 3.59E-57        | 1371        |
| Gene Expression                   | transcription of RNA                    | 2.17E-55        | 1343        |
| Gene Expression                   | expression of RNA                       | 3.58E-54        | 1500        |
| Cellular Growth and Proliferation | proliferation of cells                  | 1.01E-52        | 2488        |
| Cell Death and Survival           | cell death                              | 1.94E-50        | 2324        |
| Organismal Survival               | organismal death                        | 5.02E-48        | 1715        |
| Gene Expression                   | expression of DNA                       | 5.55E-45        | 1097        |
| Gene Expression                   | transcription of DNA                    | 1.71E-44        | 1047        |
| Cell Death and Survival           | apoptosis                               | 3.01E-44        | 1860        |
| Cell Death and Survival           | necrosis                                | 1.01E-40        | 1796        |
| Cancer                            | Cancer                                  | 1.13E-37        | 4552        |
| Gene Expression                   | activation of DNA endogenous promoter   | 1.46E-36        | 751         |
| Cell Death and Survival           | cell death of tumor cell lines          | 2.15E-34        | 1069        |
| Tissue Morphology                 | abnormal morphology of embryonic tissue | 3.83E-32        | 468         |



**Supplementary Table 5: Statistically significant differences in methylation of Bcl-2 family members in MCL patient samples before and after BZM treatment**

| Array Probe ID    | Refseq ID                       | Gene Symbol   | Entrez Gene Name                                  | <i>P</i> value* |
|-------------------|---------------------------------|---------------|---------------------------------------------------|-----------------|
| MSPI0406S00569367 | NM_004322, NM_032989            | BAD           | BCL2-associated agonist of cell death             | 0.0163          |
| MSPI0406S00569368 | NM_004322, NM_032990            | BAD           | BCL2-associated agonist of cell death             | 0.0005          |
| MSPI0406S00569369 | NM_004322, NM_032991            | BAD           | BCL2-associated agonist of cell death             | 0.0160          |
| MSPI0406S00317467 | NM_001188                       | BAK1          | BCL2-antagonist/killer 1                          | 0.0006          |
| MSPI0406S00898897 | NM_014417                       | BBC3 (Puma)   | BCL2 binding component 3                          | 0.0106          |
| MSPI0406S00898898 | NM_014417                       | BBC3 (Puma)   | BCL2 binding component 3                          | 0.0342          |
| MSPI0406S00125137 | NM_006538, NM_138621, NM_207002 | BCL2L11 (BIM) | BCL2-like 11 (apoptosis facilitator)              | 0.0025          |
| MSPI0406S00125138 | NM_006538, NM_138621, NM_207002 | BCL2L11 (BIM) | BCL2-like 11 (apoptosis facilitator)              | 0.0169          |
| MSPI0406S00954989 | NM_001196, NM_197966, NM_197967 | BID           | BH3 interacting domain death agonist              | 0.0038          |
| MSPI0406S00852330 | NM_021127                       | PMAIP1 (Noxa) | phorbol-12-myristate-13-acetate-induced protein 1 | 0.0395          |
| MSPI0406S00852331 | NM_021127                       | PMAIP1 (Noxa) | phorbol-12-myristate-13-acetate-induced protein 1 | 0.0182          |

\**P* values are calculated for the methylation differences between samples before and after BZM treatment for loci representing Bcl-2 family member genes.

Analysis was performed for the samples from 6 MCL patients. All *P*-values displayed were calculated by one-sided Student's *t*-test.

**Supplementary Table 6: Primer sequences for siRNA knockout, MassARRAY, and Quantitative Real-Time Polymerase Chain Reaction**

| Primer Name                                             | Primer Sequence                                                          |
|---------------------------------------------------------|--------------------------------------------------------------------------|
| <b>siRNA knockout</b>                                   |                                                                          |
| Noxa (PMAIP1) siRNA, # 05                               | 5' AAACUGAACUCCGGCAGA                                                    |
| Noxa (PMAIP1) siRNA, # 08                               | 5' GCAAGAACGCUCAACCGAG                                                   |
| Non-targeting siRNA                                     | 5' UAAGGCUAUGAAGAGAUAC                                                   |
| <b>MassARRAY</b>                                        |                                                                          |
| PMAIP1 Primer 1 Forward                                 | 5' aggaagagagTATTTAGGTAGAGAGTATTGTTTTGATTT                               |
| PMAIP1 Primer 1 Reverse                                 | 5' cagtaatac <b>gactcactatagggaga</b> aggctCCAAACTAAACACTTCTAAAAACCC     |
| PMAIP1 Primer 2 Forward                                 | 5' aggaagagagAGGAGATGTTAGAGGTTTTGTGAGA                                   |
| PMAIP1 Primer 2 Reverse                                 | 5' cagtaatac <b>gactcactatagggaga</b> aggctTCAAAACAATACTCTCTACCTAAATAAAC |
| PMAIP1 Primer 3 Forward                                 | 5' aggaagagagTGTTTAGTGAGAATTTTTTTGGTGA                                   |
| PMAIP1 Primer 3 Reverse                                 | 5' cagtaatac <b>gactcactatagggaga</b> aggctCCAATCTCTTTTCTAAACTTATTTACCC  |
| PMAIP1 Primer 4 Forward                                 | 5' aggaagagagAGGAGGAAAGGAGTTTTTTGTTTT                                    |
| PMAIP1 Primer 4 Reverse                                 | 5' cagtaatac <b>gactcactatagggaga</b> aggctCCAACATCCCTACCTACAAACTATT     |
| PMAIP1 Primer 5 Forward                                 | 5' aggaagagagGGTTGTTTTTAGGAGAAAGTTATTG                                   |
| PMAIP1 Primer 5 Reverse                                 | 5' cagtaatac <b>gactcactatagggaga</b> aggctACAACAACAATATAACCCACACAAA     |
| <b>Quantitative Real-Time Polymerase Chain Reaction</b> |                                                                          |
| PMAIP1 Forward                                          | 5' AGCTGGAAGTCGAGTGTGCT                                                  |
| PMAIP1 Reverse                                          | 5' TCCTGAGCAGAAGAGTTTGGG                                                 |
| HPRT Forward                                            | 5' AAAGGACCCACGAAGTGTT                                                   |
| HPRT Reverse                                            | 5' TCAAGGGCATATCCTACAACAA                                                |
